# Supplementary material for: Plant-based hydrocolloids for efficient clarification of cane juices: rheological analysis and solidification studies
Source: Royal Society of Chemistry journal article supplement (doi:10.1039/d3fo05029g), 2024-01-01
Supplement: d3fo05029g1.xlsx [file d3fo05029g1.xlsx]

## Sheet: guargum
Data Series Information
Name:			GUAR GUM 1
Sample:			SUGAR CANE JUICE
Operator:			SHANAVAS
Meas. Pts.	Shear Rate	Shear Stress	Viscosity	Shear Stress		Shear Stress
	[1/s]	[Pa]	[Pa·s]	[Pa]		[Pa]
1	4	0.0718	0.0179
2	5.78	0.0118
3
4	9.33			0.00459
5
6	12.9	0.0181
7
8	16.4			0.0479
9	18.2	0.161	0.009	0.0228
10	20	0.166	0.0092	0.0891		0.12755	0.0063775
11	21.8	0.262	0.009	0.0733		0.1376	0.00631193
12	23.6	0.236	0.0088	0.101		0.1456	0.00616949
13	25.3	0.231	0.0091	0.176		0.154	0.00608696
14	27.1	0.227	0.009	0.148		0.164	0.00605166
15	28.9	0.243	0.0089	0.179		0.169	0.00584775
16	30.7	0.235	0.0089	0.193		0.178	0.00579805
17	32.4	0.277	0.009	0.209		0.203	0.00626543
18	34.2	0.285	0.0087	0.218		0.214	0.00625731
19	36	0.303	0.0089	0.21		0.224	0.00622222
20	37.8	0.326	0.0092	0.239		0.225	0.00595238
21	39.6	0.348	0.0093	0.259		0.247	0.00623737
22	41.3	0.339	0.0093	0.264		0.25	0.00605327
23	43.1	0.351	0.0091	0.268		0.265	0.00614849
24	44.9	0.361	0.009	0.285		0.278	0.00619154
25	46.7	0.378	0.0087	0.304		0.28	0.00599572
26	48.4	0.389	0.0089	0.328		0.298	0.00615702
27	50.2	0.392	0.009	0.377		0.303	0.00603586
28	52	0.411	0.009	0.394		0.321	0.00617308
29	53.8	0.439	0.0089	0.395		0.35	0.00650558
30	55.6	0.444	0.0089	0.399		0.356	0.00640288
31	57.3	0.443	0.0087	0.41		0.367	0.00640489
32	59.1	0.461	0.0086	0.453		0.377	0.00637902
33	60.9	0.47	0.0089	0.46		0.389	0.00638752
34	62.7	0.497	0.0087	0.473		0.42	0.00669856
35	64.4	0.525	0.009	0.49		0.405	0.00628882
36	66.2	0.545	0.0087	0.529		0.421	0.00635952
37	68	0.546	0.0086	0.543		0.416	0.00611765
38	69.8	0.571	0.0089	0.536		0.43	0.00616046
39	71.6	0.606	0.0087	0.541		0.438	0.00611732
40	73.3	0.619	0.00866	0.561		0.44	0.00600273
41	75.1	0.654	0.0089	0.583		0.459	0.00611185
42	76.9	0.67	0.00877	0.58		0.46	0.00598179
43	78.7	0.682	0.00867	0.602		0.47	0.00597205
44	80.4	0.726	0.00902	0.627		0.48	0.00597015
45	82.2	0.738	0.00897	0.616		0.487	0.00592457
46	84	0.763	0.00908	0.649		0.51	0.00607143
47	85.8	0.777	0.00905	0.676		0.523	0.00609557
48	87.6	0.797	0.00911	0.721		0.564	0.00643836
49	89.3	0.821	0.00919	0.73		0.556	0.0062262
50	91.1	0.839	0.00921	0.744		0.56	0.00614709
51	92.9	0.844	0.00908	0.731		0.57	0.00613563
52	94.7	0.86	0.00908	0.748		0.578	0.00610348
53	96.4	0.888	0.00921	0.727		0.59	0.00612033
54	98.2	0.878	0.00894	0.782		0.598	0.00608961
55	100	0.906	0.00906	0.809		0.61	0.0061
56	102	0.935	0.00918	0.804		0.612	0.006
57	104	0.939	0.00907	0.822		0.618	0.00594231
58	105	0.979	0.0093	0.864		0.657	0.00625714
59	107	0.953	0.00889	0.834		0.66	0.00616822
60	109	0.95	0.00872	0.862		0.698	0.00640367
61	111	0.97	0.00877	0.879		0.712	0.00641441
62	112	0.96	0.00854	0.898		0.723	0.00645536
63	114	0.977	0.00856	0.905		0.735	0.00644737
64	116	1.02	0.00882	0.918		0.745	0.00642241
65	118	1.02	0.00869	0.885		0.755	0.00639831
66	120	1.04	0.00867	0.903		0.758	0.00631667
67	121	1.06	0.0087	0.932		0.754	0.0062314
68	123	1.03	0.00834	0.926		0.759	0.00617073
69	125	1.05	0.00841	0.979		0.769	0.006152
70	127	1.06	0.0084	0.982		0.77	0.00606299
71	128	1.09	0.00847	0.967		0.768	0.006
72	130	1.13	0.0087	0.989		0.778	0.00598462
73	132	1.13	0.00854	0.989		0.786	0.00595455
74	134	1.11	0.00832	0.981		0.791	0.00590299
75	136	1.13	0.00837	0.973		0.81	0.00595588
76	137	1.18	0.00859	0.976		0.812	0.00592701
77	139	1.13	0.00816	0.984		0.817	0.0058777
78	141	1.15	0.00814	0.978		0.82	0.0058156
79	143	1.12	0.00785	1.01		0.827	0.00578322
80	144	1.14	0.0079	0.994		0.82	0.00569444
81	146	1.16	0.00794	0.979		0.83	0.00568493
82	148	1.17	0.00789	0.991		0.835	0.00564189
83	150	1.16	0.00777	0.966		0.842	0.00561333
84	152	1.18	0.00779	1.01		0.847	0.00557237
85	153	1.19	0.00776	1.01		0.85	0.00555556
86	155	1.2	0.00775	1.02		0.856	0.00552258
87	157	1.21	0.0077	0.999		0.865	0.00550955
88	159	1.2	0.00757	1.03		0.87	0.0054717
89	160	1.2	0.00749	1.08		0.876	0.005475
90	162	1.19	0.00734	1.11		0.87	0.00537037
91	164	1.19	0.00726	1.13		0.876	0.00534146
92	166	1.2	0.00722	1.18		0.88	0.0053012
93	168	1.18	0.00706	1.16		0.878	0.00522619
94	169	1.2	0.0071	1.13		0.88	0.0052071
95	171	1.27	0.00719	1.24		0.88	0.0051462
96	173	1.29	0.00708	1.2		0.88	0.00508671
97	175	1.35	0.007	1.23		0.88	0.00502857
98	176	1.32	0.0071	1.19		0.88	0.005
99	178	1.32	0.00709	1.24		0.88	0.00494382
100	180	1.31	0.00707	1.24		0.88	0.00488889

## Sheet: xanthum gum
Data Series Information
Name:			XANTHANE GUM 1
Sample:			SUGAR CANE JUICE
Operator:			SHANAVAS
Meas. Pts.	Shear Rate	Shear Stress	Viscosity
	[1/s]	[Pa]	[Pa·s]
1
2
3
4	9.33	0.605	0.0648446
5	11.1	0.622	0.056036
6	12.9	0.576	0.0446512
7	14.7	0.657	0.0446939
8	16.4	0.625	0.0381098
9	18.2	0.598	0.0328571
10	20	0.634	0.0317
11	21.8	0.64	0.0293578
12	23.6	0.654	0.0277119
13	25.3	0.673	0.0266008
14	27.1	0.698	0.0257565
15	28.9	0.767	0.0265398
16	30.7	0.751	0.0244625
17	32.4	0.803	0.024784
18	34.2	0.834	0.024386
19	36	0.846	0.0235
20	37.8	0.875	0.0231481
21	39.6	0.917	0.0231566
22	41.3	0.928	0.0224697
23	43.1	0.959	0.0222506
24	44.9	0.999	0.0222494
25	46.7	1.01	0.0216274
26	48.4	1.04	0.0214876
27	50.2	1.06	0.0211155
28	52	1.06	0.0203846
29	53.8	1.07	0.0198885
30	55.6	1.07	0.0192446
31	57.3	1.09	0.0190227
32	59.1	1.14	0.0192893
33	60.9	1.18	0.019376
34	62.7	1.2	0.0191388
35	64.4	1.21	0.0187888
36	66.2	1.24	0.0187311
37	68	1.27	0.0186765
38	69.8	1.29	0.0184814
39	71.6	1.33	0.0185754
40	73.3	1.36	0.0185539
41	75.1	1.39	0.0185087
42	76.9	1.38	0.0179454
43	78.7	1.4	0.0177891
44	80.4	1.43	0.0177861
45	82.2	1.43	0.0173966
46	84	1.44	0.0171429
47	85.8	1.47	0.0171329
48	87.6	1.46	0.0166667
49	89.3	1.46	0.0163494
50	91.1	1.49	0.0163557
51	92.9	1.5	0.0161464
52	94.7	1.51	0.0159451
53	96.4	1.55	0.0160788
54	98.2	1.58	0.0160896
55	100	1.59	0.0159
56	102	1.62	0.0158824
57	104	1.63	0.0156731
58	105	1.64	0.015619
59	107	1.66	0.015514
60	109	1.65	0.0151376
61	111	1.67	0.015045
62	112	1.7	0.0151786
63	114	1.68	0.0147368
64	116	1.68	0.0144828
65	118	1.7	0.0144068
66	120	1.7	0.0141667
67	121	1.72	0.0142149
68	123	1.75	0.0142276
69	125	1.76	0.01408
70	127	1.77	0.013937
71	128	1.78	0.0139063
72	130	1.81	0.0139231
73	132	1.81	0.0137121
74	134	1.79	0.0133582
75	136	1.78	0.0130882
76	137	1.79	0.0130657
77	139	1.8	0.0129496
78	141	1.82	0.0129078
79	143	1.8	0.0125874
80	144	1.81	0.0125694
81	146	1.81	0.0123973
82	148	1.82	0.0122973
83	150	1.81	0.0120667
84	152	1.82	0.0119737
85	153	1.83	0.0119608
86	155	1.82	0.0117419
87	157	1.84	0.0117197
88	159	1.85	0.0116352
89	160	1.87	0.0116875
90	162	1.91	0.0117901
91	164	1.93	0.0117683
92	166	1.93	0.0116265
93	168	1.93	0.0114881
94	169	1.94	0.0114793
95	171	1.94	0.011345
96	173	1.91	0.0110405
97	175	1.91	0.0109143
98	176	1.87	0.010625
99	178	1.9	0.0106742
100	180	1.9	0.0105556

## Sheet: Lime
Data Series Information
Name:			LIME-1 1
Sample:			SUGAR CANE JUICE
Operator:			SHANAVAS
Meas. Pts.	Shear Rate			Shear Rate	Shear Stress	Viscosity
	[1/s]			[1/s]	[Pa]	[Pa·s]
1	4			4
2	5.78			5.78	0.0604
3	7.55			7.56	0.048
4
5	11.1			11.1
6	12.9			12.9
7
8	16.4			16.4
9	18.2			18.2	0.076		0.00417582
10	20			20	0.067		0.00335
11	21.8			21.8	0.076		0.00348624
12	23.6			23.6	0.08		0.00338983
13	25.3			25.3	0.0677		0.00267589
14	27.1			27.1	0.106		0.00391144
15	28.9			28.9
16	30.7			30.7	0.119		0.00387622
17	32.4			32.4	0.126		0.00388889
18	34.2			34.2	0.13		0.00380117
19	36			36	0.136		0.00377778
20	37.8			37.8	0.145		0.00383598
21	39.6			39.6	0.134		0.00338384
22	41.3			41.3	0.144		0.00348668
23	43.1			43.1	0.147		0.00341067
24	44.9			44.9	0.15		0.00334076
25	46.7			46.7	0.152		0.00325482
26	48.4			48.4	0.155		0.00320248
27	50.2			50.2	0.1598		0.00318327
28	52			52	0.16		0.00307692
29	53.8			53.8	0.17		0.00315985
30	55.6			55.6	0.18		0.00323741
31	57.3			57.3	0.194		0.00338569
32	59.1			59.1	0.202		0.00341794
33	60.9			60.9	0.21		0.00344828
34	62.7			62.7	0.193		0.00307815
35	64.4			64.4	0.21		0.00326087
36	66.2			66.2	0.217		0.00327795
37	68			68	0.231		0.00339706
38	69.8			69.8	0.227		0.00325215
39	71.6			71.6	0.253		0.00353352
40	73.3			73.3	0.254		0.00346521
41	75.1			75.1	0.255		0.00339547
42	76.9			76.9	0.281		0.0036541
43	78.7			78.7	0.287		0.00364676
44	80.4			80.4	0.292		0.00363184
45	82.2			82.2	0.278		0.003382
46	84			84	0.278		0.00330952
47	85.8			85.8	0.28		0.0032634
48	87.6			87.6	0.283		0.00323059
49	89.3			89.3	0.29		0.00324748
50	91.1			91.1	0.302		0.00331504
51	92.9			92.9	0.308		0.00331539
52	94.7			94.7	0.31		0.0032735
53	96.4			96.4	0.3		0.00311203
54	98.2			98.2	0.304		0.00309572
55	100			100	0.3		0.003
56	102			102	0.311		0.00304902
57	104			104	0.304		0.00292308
58	105			105	0.31		0.00295238
59	107			107	0.316		0.00295327
60	109			109	0.32		0.00293578
61	111			111	0.33		0.00297297
62	112			112	0.34		0.00303571
63	114			114	0.337		0.00295614
64	116			116	0.345		0.00297414
65	118			118	0.348		0.00294915
66	120			120	0.35		0.00291667
67	121			121	0.36		0.00297521
68	123			123	0.368		0.00299187
69	125			125	0.37		0.00296
70	127			127	0.376		0.00296063
71	128			128	0.38		0.00296875
72	130			130	0.408		0.00313846
73	132			132	0.43		0.00325758
74	134			134	0.403		0.00300746
75	136			136	0.413		0.00303676
76	137			137	0.416		0.0030365
77	139			139	0.402		0.00289209
78	141			141	0.412		0.00292199
79	143			143	0.414		0.0028951
80	144			144	0.429		0.00297917
81	146			146	0.427		0.00292466
82	148			148	0.43		0.00290541
83	150			150	0.432		0.00288
84	152			152	0.4206		0.00276711
85	153			153	0.43		0.00281046
86	155			155	0.44		0.00283871
87	157			157	0.453		0.00288535
88	159			159	0.46		0.00289308
89	160			160	0.465		0.00290625
90	162			162	0.47		0.00290123
91	164			164	0.476		0.00290244
92	166			166	0.48		0.00289157
93	168			168	0.486		0.00289286
94	169			169	0.49		0.00289941
95	171			171	0.495		0.00289474
96	173			173	0.502		0.00290173
97	175			175	0.51		0.00291429
98	176			176	0.518		0.00294318
99	178			178	0.52		0.00292135
100	180			180	0.53		0.00294444

## Sheet: starch
Data Series Information
Name:			STARCH-1 1
Sample:			SUGAR CANE JUICE
Operator:			SHANAVAS
Meas. Pts.	Shear Rate	Shear Stress	Viscosity	Shear Rate	Shear Stress	Viscosity
	[1/s]	[Pa]	[Pa·s]	[1/s]	[Pa]	[Pa·s]
1	4	0.034		4	0.0607	0.0152
2	5.78	0.0409		5.78
3	7.56	0.03		7.56	0.00518	0.000686
4	9.33	0.0235		9.33
5				11.1
6				12.9
7				14.7
8	16.4	0.0183		16.4
9	18.2	0.02		18.2
10	20	0.02		20
11			#DIV/0!	21.8
12			#DIV/0!	23.6
13			#DIV/0!	25.3
14			#DIV/0!	27.1
15	28.9	0.024	0.00083045	28.9
16	30.7	0.028	0.000912052	30.7	0.00412	0.000134
17	32.4	0.03	0.000925926	32.4	0.0101	0.000312
18	34.2	0.036	0.00105263	34.2	0.0227	0.000663
19	36	0.0306	0.00085	36	0.0215	0.000599
20	37.8	0.034	0.000899471	37.8	0.037	0.000978
21	39.6	0.05	0.00126263	39.6	0.064	0.00162
22	41.3	0.056	0.00135593	41.3	0.0694	0.00168
23	43.1	0.06	0.00139211	43.1	0.0967	0.00224
24	44.9	0.076	0.00169265	44.9	0.0863	0.00192
25	46.7	0.08	0.00171306	46.7	0.105	0.00225
26	48.4	0.086	0.00177686	48.4	0.12	0.00247
27	50.2	0.095	0.00189243	50.2	0.122	0.00244
28	52	0.109	0.00209615	52	0.135	0.00261
29	53.8	0.131	0.00243494	53.8	0.13	0.00242
30	55.6	0.157	0.00282374	55.6	0.131	0.00236
31	57.3	0.17	0.00296684	57.3	0.147	0.00256
32	59.1	0.169	0.00285956	59.1	0.146	0.00247
33	60.9	0.172	0.0028243	60.9	0.163	0.00267
34	62.7	0.175	0.00279107	62.7	0.173	0.00277
35	64.4	0.18	0.00279503	64.4	0.205	0.00318
36	66.2	0.187	0.00282477	66.2	0.214	0.00322
37	68	0.186	0.00273529	68	0.228	0.00336
38	69.8	0.19	0.00272206	69.8	0.264	0.00379
39	71.6	0.193	0.00269553	71.6	0.286	0.004
40	73.3	0.197	0.00268759	73.3	0.292	0.00398
41	75.1	0.204	0.00271638	75.1	0.294	0.00391
42	76.9	0.21	0.00273082	76.9	0.294	0.00383
43	78.7	0.216	0.0027446	78.7	0.311	0.00395
44	80.4	0.22	0.00273632	80.4	0.32	0.00397
45	82.2	0.226	0.00274939	82.2	0.339	0.00412
46	84	0.23	0.0027381	84	0.354	0.00422
47	85.8	0.241	0.00280886	85.8	0.359	0.00419
48	87.6	0.25	0.00285388	87.6	0.372	0.00425
49	89.3	0.258	0.00288914	89.3	0.385	0.0043
50	91.1	0.257	0.00282108	91.1	0.396	0.00435
51	92.9	0.263	0.002831	92.9	0.386	0.00415
52	94.7	0.274	0.00289335	94.7	0.396	0.00418
53	96.4	0.28	0.00290456	96.4	0.417	0.00433
54	98.2	0.278	0.00283096	98.2	0.419	0.00427
55	100	0.281	0.00281	100	0.419	0.00419
56	102	0.285	0.00279412	102	0.421	0.00414
57	104	0.29	0.00278846	104	0.426	0.00411
58	105	0.3	0.00285714	105	0.438	0.00416
59	107	0.297	0.0027757	107	0.457	0.00427
60	109	0.31	0.00284404	109	0.457	0.0042
61	111	0.317	0.00285586	111	0.473	0.00427
62	112	0.33	0.00294643	112	0.471	0.00418
63	114	0.32	0.00280702	114	0.469	0.00411
64	116	0.326	0.00281034	116	0.445	0.00384
65	118	0.33	0.00279661	118	0.441	0.00374
66	120	0.342	0.00285	120	0.444	0.00371
67	121	0.35	0.00289256	121	0.429	0.00353
68	123	0.357	0.00290244	123	0.433	0.00351
69	125	0.36	0.00288	125	0.439	0.00351
70	127	0.368	0.00289764	127	0.446	0.00352
71	128	0.38	0.00296875	128	0.477	0.00371
72	130	0.39	0.003	130	0.472	0.00363
73	132	0.4	0.0030303	132	0.492	0.00373
74	134	0.423	0.00315672	134	0.49	0.00366
75	136	0.45	0.00330882	136	0.482	0.00356
76	137	0.44	0.00321168	137	0.478	0.00348
77	139	0.453	0.00325899	139	0.496	0.00357
78	141	0.46	0.00326241	141	0.509	0.00361
79	143	0.473	0.00330769	143	0.486	0.00341
80	144	0.48	0.00333333	144	0.481	0.00333
81	146	0.489	0.00334932	146	0.457	0.00313
82	148	0.49	0.00331081	148	0.48	0.00324
83	150	0.5	0.00333333	150	0.466	0.00311
84	152	0.51	0.00335526	152	0.457	0.00301
85	153	0.518	0.00338562	153	0.456	0.00297
86	155	0.52	0.00335484	155	0.46	0.00297
87	157	0.525	0.00334395	157	0.453	0.00289
88	159	0.53	0.00333333	159	0.473	0.00298
89	160	0.537	0.00335625	160	0.491	0.00306
90	162	0.54	0.00333333	162	0.491	0.00303
91	164	0.547	0.00333537	164	0.522	0.00318
92	166	0.55	0.00331325	166	0.52	0.00313
93	168	0.557	0.00331548	168	0.512	0.00305
94	169	0.56	0.00331361	169	0.52	0.00307
95	171	0.564	0.00329825	171	0.499	0.00292
96	173	0.57	0.0032948	173	0.5	0.00289
97	175	0.578	0.00330286	175	0.505	0.00289
98	176	0.58	0.00329545	176	0.519	0.00294
99	178	0.586	0.00329213	178	0.522	0.00293
100	180	0.59	0.00327778	180	0.515	0.00286
